# Supplementary material
Source: PubMed Central journal article supplement (PMC2930731)

**Figure S1.**

HCT-116 *p53* (-/-) cells plated on the coverslip were treated with Dox and released as described previously. At indicated time, cells were stained with anti-MPM2/TRITC and hoechst 33342 for immunofluorescence microscope observation.

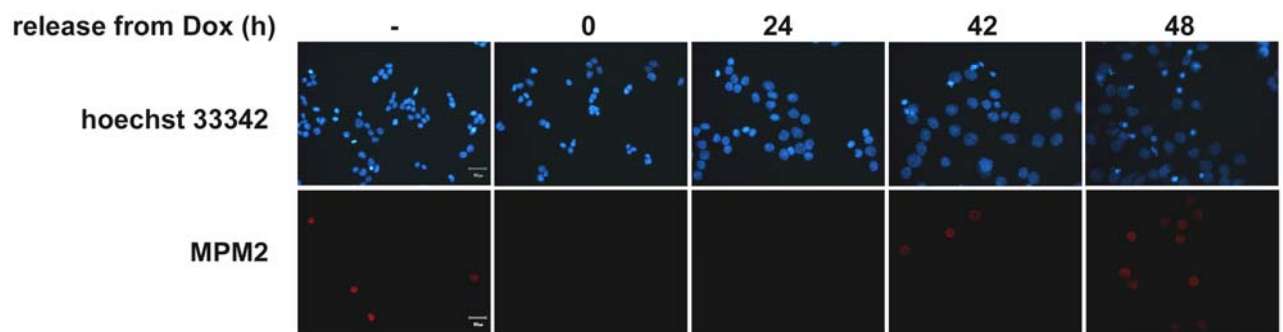

**Figure S2.**

HCT-116 *p53* (-/-) cells as described above were stained with anti-phospho-Ser10-Histone H3/TRITC, anti- $\gamma$ -H2AX/FITC antibodies and hoechst 33342 after release from Dox for 48hr.

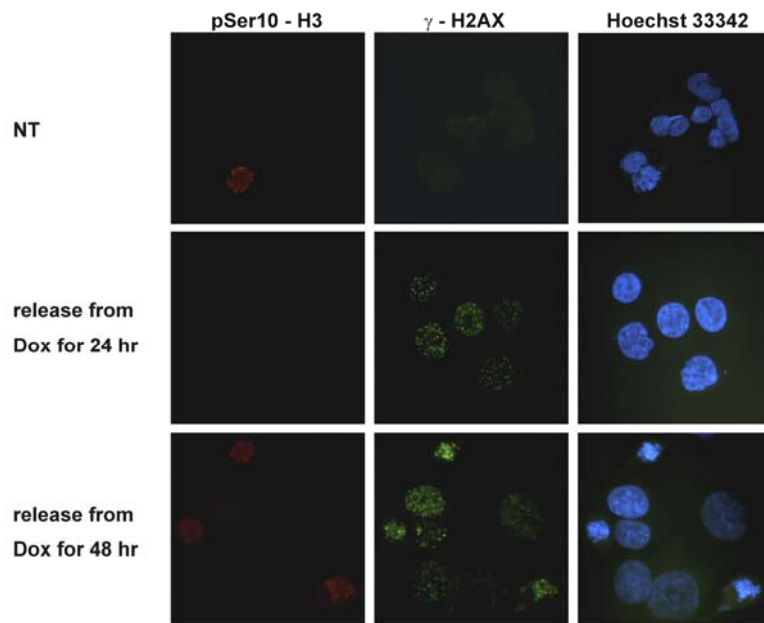

Supplement: supp_M110.137042_jbc.M110.137042-1.pdf [file supp_M110.137042_jbc.M110.137042-1.pdf]
